# Supplementary material
Source: PubMed Central journal article supplement (PMC4286039)
Supplement: rspb20141850supp1.pdf [file rspb20141850supp1.pdf]

**Table S1:** Specimen of *Lariophagus distinguendus* from the collection of the Natural History Museum London (NHML) and the University of Hohenheim (UH). Locations, dates and the original host from which they were collected are shown.

| locality      | country         | collecting date | source    | original host                                     |
|---------------|-----------------|-----------------|-----------|---------------------------------------------------|
| Paris         | France          | 01.11.1927      | NHML      | <i>Stegobium paniceum</i>                         |
| Suigen        | Korea           | 17.04.1930      | NHML      | <i>Calandra oryzae</i>                            |
| Palestro      | Algeria         | 20.05.1930      | NHML      | <i>Stegobium paniceum</i>                         |
| Algier        | Algeria         | 01.08.1931      | NHML      | <i>Calandra, Anobium</i>                          |
| Rio Salado    | Algeria         | 12.11.1931      | NHML      | <i>Calandra granaria</i>                          |
| Rabat         | Morocco         | 11.11.1933      | NHML      | <i>Sitophilus oryzae</i>                          |
| Berlin        | Germany         | may-june 1935   | NHML      | <i>Stegobium paniceum</i>                         |
| Miqve Yisrael | Palestine       | 05.12.1939      | NHML      | <i>Calandra sp.</i>                               |
| Suva          | Fiji Isl.       | 16.01.1940      | NHML      | <i>Stegobium paniceum</i>                         |
| Beirut        | Lebanon         | 23.10.1942      | NHML      | <i>Calandra oryzae (Sitophilus oryzae)</i>        |
| Slough        | England         | 1952            | NHML      | <i>Stegobium paniceum</i>                         |
| Nairobi       | Kenya           | 09.03.1967      | NHML      | <i>Sitophilus oryzae &amp; Stegobium paniceum</i> |
| Slough        | England         | 1976            | NHML      | <i>Sitophilus, Oryzaephilus, Cryptolestes</i>     |
| Birmingham    | England         | 1983            | NHML      | <i>Stegobium paniceum</i>                         |
| Slough        | England         | 01.12.1996      | NHML / UH | <i>Sitophilus granarius</i>                       |
| Pforzheim     | Germany         | 2005            | UH        | <i>Sitophilus granarius</i>                       |
| Bygholm       | Denmark         | 2005            | UH        | <i>Sitophilus granarius</i>                       |
| Stuttgart     | Germany         | 2007            | UH        | <i>Stegobium paniceum</i>                         |
| Ravensburg    | Germany         | 2008            | UH        | <i>Stegobium paniceum</i>                         |
| Satrup        | Germany         | 2010            | UH        | <i>Sitophilus granarius</i>                       |
| Birkach       | Germany         | 2011            | UH        | <i>Stegobium paniceum</i>                         |
| Wageningen    | The Netherlands | 2011            | UH        | <i>Stegobium paniceum</i>                         |
| Sachsen       | Germany         | 2011            | UH        | <i>Sitophilus granarius</i>                       |

**Table S2:** Strains used in the different experiments and the coordinates of the collection sites.

| Strains | Collection sites (Coordinates) | Host preference | Fecundity | Phylogeny |
|---------|--------------------------------|-----------------|-----------|-----------|
| RAVdb   | N 47.77827 E 9.61213           | +               | +         | +         |
| STUdb   | N 48.775418 E 9.181759         | +               | +         | +         |
| BIRdb   | N 48.71964 E 9.20938           | +               | -         | +         |
| WAGdb   | N 51.969187 E 5.665395         | -               | -         | +         |
| PFOgw   | N 48.892186 E 8.694629         | +               | +         | +         |
| SLOgw   | N 51.510538 E -0.595041        | +               | +         | +         |
| SATgw   | N 54.691977 E 9.601231         | +               | +         | +         |
| SACgw   | N 51.104541 E 13.201738        | -               | -         | +         |
| BYGgw   | N 55.864722 E 9.825556         | -               | -         | +         |

**Table S3:** Primer pairs of the different genes for the phylogenetic analysis including length of the resulting exons and introns.

| Gene             | primer pairs                                                                                   | in<br><i>Lariophagus</i> | length (bp) |         | Ref.  |
|------------------|------------------------------------------------------------------------------------------------|--------------------------|-------------|---------|-------|
|                  |                                                                                                |                          | exon        | intron  |       |
| COI              | for C1-J-2183 5'-CAACATTTATTTTGATTTTTTGG-3'<br>rev TL2-N-3014 5'-TCCAATGCACTAATCTGCCATATTA-3'  | 679                      | 679         | 0       | [S01] |
| CAD              | for 5'-CAGTTCGATGAAGAGCGTAGG-3'<br>rev 5'-ATAGACACCCGAACCTTTGAAGA-3'                           | 547                      | 509         | 38      | -     |
| ITS2             | for 5'-TGT GAA CTG CAG GAC ACA TG-3'<br>rev 5'-ATG CTT AAA TTT AGG GGG T-3'                    | 352-356                  | -           | -       | [S02] |
| LOC<br>100123206 | for HOG4652_10_A 5'-GGWTTTGGYTTTATTCGTTG-3'<br>rev HOG4652_10_A 5'-YTCTTTATTYCGYTTYACTTG-3'    | 478-490                  | 311-323     | 167     | [S03] |
| LOC<br>100123909 | for HOG5134_01_A 5'-AGTAAAATGGGTYTWATGTC-3'<br>rev HOG5134_01_A 5'-STRTTCCARTTWACTCCRTA-3'     | 504-526                  | 228         | 276-298 | [S03] |
| LOC<br>100117339 | for HOG5592_08_A 5'-YAAYGAGGACCAATCGAGAT-3'<br>rev HOG5592_08_A 5'-GCATWACRATAGATCTYGCTTCTC-3' | 548-587                  | 279-318     | 269     | [S03] |

**Table S4:** Specimen sequenced and (deposition information for specimen data and) genebank accession numbers. Specimen marked in blue were collected from *Sitophilus granarius*, strains in red from *Stegobium paniceum*.

| Specimen                   | COI      | CAD      | LOC100123206 | LOC100123909 | LOC100117339 | ITS2     |
|----------------------------|----------|----------|--------------|--------------|--------------|----------|
| SATgw_1                    | KJ867375 | KJ867394 | KJ923851     | KJ923869     | KJ923887     | KJ923908 |
| SATgw_2                    | KJ867376 | KJ867395 | KJ923865     | KJ923870     | KJ923888     | KJ923909 |
| SLOgw_1                    | KJ867377 | KJ867398 | KJ923854     | KJ923873     | KJ923891     | KJ923910 |
| SLOgw_2                    | KJ867378 | KJ867399 | KJ923855     | KJ923874     | KJ923892     | KJ923911 |
| BYGgw_1                    | KJ867379 | KJ867400 | KJ923856     | KJ923875     | KJ923893     | KJ923905 |
| BYGgw_2                    | KJ867380 | KJ867401 | KJ923857     | KJ923876     | KJ923894     | KJ923906 |
| SACgw_1                    | KJ867381 | KJ867396 | KJ923852     | KJ923871     | KJ923889     | KJ923912 |
| SACgw_2                    | KJ867382 | KJ867397 | KJ923853     | KJ923872     | KJ923890     | KJ923907 |
| PFOgw_1                    | KJ867383 | KJ867392 | KJ923849     | KJ923867     | KJ923885     | KJ923903 |
| PFOgw_2                    | KJ867384 | KJ867393 | KJ923850     | KJ923868     | KJ923886     | KJ923904 |
| STUdb_1                    | KJ867385 | KJ867402 | KJ923866     | KJ923877     | KJ923895     | KJ923915 |
| STUdb_2                    | KJ867386 | KJ867403 | KJ923858     | KJ923878     | KJ923896     | KJ923916 |
| RAVdb_1                    | KJ867387 | KJ867404 | KJ923859     | KJ923879     | KJ923897     | KJ923913 |
| RAVdb_2                    | KJ867388 | KJ867405 | KJ923860     | KJ923880     | KJ923898     | KJ923914 |
| WAGdb_1                    | KJ867389 | KJ867406 | KJ923861     | KJ923881     | KJ923899     | KJ923917 |
| WAGdb_2                    | KJ867390 | KJ867407 | KJ923862     | KJ923882     | KJ923900     | KJ923918 |
| BIRdb_1                    | KJ867391 | KJ867408 | KJ923863     | KJ923883     | KJ923901     | KJ923919 |
| BIRdb_2                    | -        | KJ867409 | KJ923864     | KJ923884     | KJ923902     | KJ923920 |
| <i>Nasonia vitripennis</i> | EU746610 | KC213163 | KJ923921     | XM_001607631 | KJ923922     | KJ923923 |

**Table S5:** Partition and substitution models. The partitions for the two analysis (mtDNA and nDNA) with there best-fit substitution models HKY [S04], K80 [S05] and JC [S06] are shown. The discrete gamma model of heterogeneity among sites (+G) [S07] and the invariant site model (+I) were used in three partitions. The over all base pairs for each partition as well as the constant and parsimony informative characters are given.

| Partition                                                                    | Best-fit substitution model | Characters | Constant characters | Parsimony-informative characters |
|------------------------------------------------------------------------------|-----------------------------|------------|---------------------|----------------------------------|
| COI 1 <sup>st</sup> +2 <sup>nd</sup> codon position                          | HKY+I                       | 452        | 402                 | 21                               |
| COI 3 <sup>rd</sup> codon position                                           | HKY+G                       | 227        | 108                 | 84                               |
| p1: 1 <sup>st</sup> +2 <sup>nd</sup> codon position of CAD and the LOC genes | HKY                         | 923        | 908                 | 1                                |
| p2: 3 <sup>rd</sup> codon position of CAD and the LOC genes                  | K80                         | 461        | 350                 | 8                                |
| p3: Introns of CAD and the LOC genes                                         | HKY                         | 777        | 633                 | 9                                |
| p4: ITS2                                                                     | JC+G                        | 449        | 359                 | 9                                |

| COI   | PFOgw | SATgw | SACgw | SLOGw | BYGgw | STUdb | BIRdb | RAVdb | WAGdb | N.v.  |
|-------|-------|-------|-------|-------|-------|-------|-------|-------|-------|-------|
| PFOgw | 0,024 | 0,016 | 0,022 | 0,024 | 0,140 | 0,127 | 0,140 | 0,135 | 0,175 |       |
| SATgw |       | 0,028 | 0,004 | 0,009 | 0,138 | 0,125 | 0,138 | 0,134 | 0,177 |       |
| SACgw |       |       | 0,027 | 0,025 | 0,141 | 0,134 | 0,141 | 0,137 | 0,178 |       |
| SLOGw |       |       |       | 0,004 | 0,141 | 0,128 | 0,141 | 0,137 | 0,174 |       |
| BYGgw |       |       |       |       | 0,141 | 0,131 | 0,141 | 0,137 | 0,175 |       |
| STUdb |       |       |       |       |       | 0,028 | 0,000 | 0,006 | 0,178 |       |
| BIRdb |       |       |       |       |       |       | 0,028 | 0,028 | 0,177 |       |
| RAVdb |       |       |       |       |       |       |       | 0,006 | 0,178 |       |
| WAGdb |       |       |       |       |       |       |       |       | 0,181 |       |
| N.v.  |       |       |       |       |       |       |       |       |       | 0,181 |

**Introns**

| ITS2  | PFOgw | SATgw | SACgw | SLOGw | BYGgw | STUdb | BIRdb | RAVdb | WAGdb | N.v.  |
|-------|-------|-------|-------|-------|-------|-------|-------|-------|-------|-------|
| PFOgw | 0,000 |       |       |       |       |       |       |       |       |       |
| SATgw | 0,000 | 0,000 |       |       |       |       |       |       |       |       |
| SACgw | 0,000 | 0,000 | 0,000 |       |       |       |       |       |       |       |
| SLOGw | 0,000 | 0,000 | 0,000 | 0,000 |       |       |       |       |       |       |
| BYGgw | 0,000 | 0,000 | 0,000 | 0,000 | 0,023 |       |       |       |       |       |
| STUdb | 0,023 | 0,023 | 0,023 | 0,023 | 0,023 | 0,000 |       |       |       |       |
| BIRdb | 0,023 | 0,023 | 0,023 | 0,023 | 0,023 | 0,000 | 0,000 |       |       |       |
| RAVdb | 0,023 | 0,023 | 0,023 | 0,023 | 0,023 | 0,000 | 0,000 | 0,000 |       |       |
| WAGdb | 0,023 | 0,023 | 0,023 | 0,023 | 0,023 | 0,000 | 0,000 | 0,000 | 0,252 |       |
| N.v.  | 0,240 | 0,239 | 0,240 | 0,241 | 0,239 | 0,252 | 0,252 | 0,252 | 0,252 | 0,252 |

**rDNA (449bp)**

| CAD   | PFOgw | SATgw | SACgw | SLOGw | BYGgw | STUdb | BIRdb | RAVdb | WAGdb | N.v.  |
|-------|-------|-------|-------|-------|-------|-------|-------|-------|-------|-------|
| PFOgw | 0,002 | 0,002 | 0,002 | 0,002 | 0,002 | 0,008 | 0,006 | 0,006 | 0,006 | 0,165 |
| SATgw | 0,026 | 0,000 | 0,000 | 0,000 | 0,000 | 0,006 | 0,004 | 0,004 | 0,004 | 0,167 |
| SACgw | 0,026 | 0,000 | 0,000 | 0,000 | 0,000 | 0,006 | 0,004 | 0,004 | 0,004 | 0,167 |
| SLOGw | 0,026 | 0,000 | 0,000 | 0,000 | 0,000 | 0,006 | 0,004 | 0,004 | 0,004 | 0,167 |
| BYGgw | 0,026 | 0,000 | 0,000 | 0,000 | 0,006 | 0,006 | 0,004 | 0,004 | 0,004 | 0,167 |
| STUdb | 0,000 | 0,026 | 0,026 | 0,026 | 0,026 | 0,002 | 0,002 | 0,002 | 0,002 | 0,169 |
| BIRdb | 0,000 | 0,026 | 0,026 | 0,026 | 0,026 | 0,000 | 0,000 | 0,000 | 0,000 | 0,167 |
| RAVdb | 0,000 | 0,026 | 0,026 | 0,026 | 0,026 | 0,000 | 0,000 | 0,000 | 0,000 | 0,167 |
| WAGdb | 0,000 | 0,026 | 0,026 | 0,026 | 0,026 | 0,000 | 0,000 | 0,000 | 0,000 | 0,167 |
| N.v.  | 0,289 | 0,263 | 0,263 | 0,263 | 0,263 | 0,289 | 0,289 | 0,289 | 0,289 | 0,289 |

**Introns (41bp)**

| LOC100123206 | PFOgw | SATgw | SACgw | SLOGw | BYGgw | STUdb | BIRdb | RAVdb | WAGdb | N.v.  |
|--------------|-------|-------|-------|-------|-------|-------|-------|-------|-------|-------|
| PFOgw        | 0,000 | 0,000 | 0,000 | 0,000 | 0,000 | 0,006 | 0,006 | 0,006 | 0,006 | 0,040 |
| SATgw        | 0,000 | 0,000 | 0,000 | 0,000 | 0,000 | 0,006 | 0,006 | 0,006 | 0,006 | 0,039 |
| SACgw        | 0,000 | 0,000 | 0,000 | 0,000 | 0,000 | 0,006 | 0,006 | 0,006 | 0,006 | 0,040 |
| SLOGw        | 0,000 | 0,000 | 0,000 | 0,000 | 0,000 | 0,006 | 0,006 | 0,006 | 0,006 | 0,040 |
| BYGgw        | 0,003 | 0,003 | 0,003 | 0,003 | 0,006 | 0,006 | 0,006 | 0,006 | 0,006 | 0,040 |
| STUdb        | 0,006 | 0,006 | 0,006 | 0,006 | 0,009 | 0,000 | 0,000 | 0,000 | 0,000 | 0,036 |
| BIRdb        | 0,006 | 0,006 | 0,006 | 0,006 | 0,009 | 0,000 | 0,000 | 0,000 | 0,000 | 0,037 |
| RAVdb        | 0,006 | 0,006 | 0,006 | 0,006 | 0,009 | 0,000 | 0,000 | 0,000 | 0,000 | 0,037 |
| WAGdb        | 0,006 | 0,006 | 0,006 | 0,006 | 0,009 | 0,000 | 0,000 | 0,000 | 0,000 | 0,037 |
| N.v.         | 0,353 | 0,353 | 0,353 | 0,353 | 0,353 | 0,361 | 0,361 | 0,361 | 0,361 | 0,361 |

**Introns (169bp)**

| LOC100123909 | PFOgw | SATgw | SACgw | SLOGw | BYGgw | STUdb | BIRdb | RAVdb | WAGdb | N.v.  |
|--------------|-------|-------|-------|-------|-------|-------|-------|-------|-------|-------|
| PFOgw        | 0,000 | 0,000 | 0,000 | 0,000 | 0,000 | 0,013 | 0,013 | 0,013 | 0,013 | 0,061 |
| SATgw        | 0,000 | 0,000 | 0,000 | 0,000 | 0,000 | 0,013 | 0,013 | 0,013 | 0,013 | 0,061 |
| SACgw        | 0,000 | 0,000 | 0,000 | 0,000 | 0,000 | 0,013 | 0,013 | 0,013 | 0,013 | 0,061 |
| SLOGw        | 0,000 | 0,000 | 0,000 | 0,000 | 0,000 | 0,013 | 0,013 | 0,013 | 0,013 | 0,061 |
| BYGgw        | 0,000 | 0,000 | 0,000 | 0,000 | 0,013 | 0,013 | 0,013 | 0,013 | 0,013 | 0,061 |
| STUdb        | 0,011 | 0,011 | 0,011 | 0,011 | 0,011 | 0,000 | 0,000 | 0,000 | 0,000 | 0,057 |
| BIRdb        | 0,011 | 0,011 | 0,011 | 0,011 | 0,011 | 0,000 | 0,000 | 0,000 | 0,000 | 0,057 |
| RAVdb        | 0,010 | 0,011 | 0,011 | 0,010 | 0,011 | 0,000 | 0,000 | 0,000 | 0,000 | 0,057 |
| WAGdb        | 0,011 | 0,011 | 0,011 | 0,011 | 0,011 | 0,000 | 0,000 | 0,000 | 0,000 | 0,057 |
| N.v.         | -     | -     | -     | -     | -     | -     | -     | -     | -     | -     |

**Introns (298bp)**

| LOC100117339 | PFOgw | SATgw | SACgw | SLOGw | BYGgw | STUdb | BIRdb | RAVdb | WAGdb | N.v.  |
|--------------|-------|-------|-------|-------|-------|-------|-------|-------|-------|-------|
| PFOgw        | 0,000 | 0,000 | 0,000 | 0,000 | 0,000 | 0,000 | 0,000 | 0,000 | 0,000 | 0,036 |
| SATgw        | 0,000 | 0,000 | 0,000 | 0,000 | 0,000 | 0,000 | 0,000 | 0,000 | 0,000 | 0,038 |
| SACgw        | 0,000 | 0,000 | 0,000 | 0,000 | 0,000 | 0,000 | 0,000 | 0,000 | 0,000 | 0,037 |
| SLOGw        | 0,004 | 0,002 | 0,004 | 0,000 | 0,000 | 0,000 | 0,000 | 0,000 | 0,000 | 0,036 |
| BYGgw        | 0,004 | 0,002 | 0,004 | 0,000 | 0,000 | 0,000 | 0,000 | 0,000 | 0,000 | 0,038 |
| STUdb        | 0,015 | 0,013 | 0,015 | 0,011 | 0,011 | 0,000 | 0,000 | 0,000 | 0,000 | 0,036 |
| BIRdb        | 0,015 | 0,013 | 0,015 | 0,011 | 0,011 | 0,000 | 0,000 | 0,000 | 0,000 | 0,038 |
| RAVdb        | 0,015 | 0,013 | 0,015 | 0,011 | 0,011 | 0,000 | 0,000 | 0,000 | 0,000 | 0,035 |
| WAGdb        | 0,015 | 0,013 | 0,015 | 0,011 | 0,011 | 0,000 | 0,000 | 0,000 | 0,000 | 0,038 |
| N.v.         | 0,323 | 0,322 | 0,323 | 0,319 | 0,319 | 0,316 | 0,316 | 0,315 | 0,316 | 0,316 |

**Introns (269bp)**

**Figure S6:** Estimates of evolutionary divergence over sequence pairs between groups. The number of base differences per site from averaging over all sequence pairs between groups are shown. The analysis involved 19 nucleotide sequences (18 in COI and Introns of LOC100123909). All ambiguous positions were removed for each sequence pair. Evolutionary analyses were conducted in MEGA6 [S08].

**Table S7:** Drilling duration and frequency of drilling of the different strains with either preimaginal or early adult experience. Experience on *Stegobium* is mared in red, on *Sitophilus* marked in blue.

| strains | experience                                       | drilling duration |                   | frequency of drilling |                   |
|---------|--------------------------------------------------|-------------------|-------------------|-----------------------|-------------------|
|         |                                                  | <i>Stegobium</i>  | <i>Sitophilus</i> | <i>Stegobium</i>      | <i>Sitophilus</i> |
| RAVdb   | preimaginal<br>experience on<br><i>Stegobium</i> | 111.89            | 0                 | 19                    | 0                 |
|         |                                                  | 34.37             | 0                 | 4                     | 0                 |
|         |                                                  | 31.48             | 0                 | 8                     | 0                 |
|         |                                                  | 177.18            | 0                 | 17                    | 0                 |
|         |                                                  | 0                 | 0                 | 0                     | 0                 |
|         |                                                  | 77.41             | 0                 | 6                     | 0                 |
|         |                                                  | 41.01             | 0                 | 7                     | 0                 |
|         |                                                  | 67.03             | 6.86              | 7                     | 2                 |
|         |                                                  | 138.22            | 0                 | 9                     | 0                 |
|         |                                                  | 66.66             | 0                 | 14                    | 0                 |
|         |                                                  | 98.28             | 4.55              | 1                     | 1                 |
|         |                                                  | 76.71             | 27.57             | 14                    | 3                 |
|         |                                                  | 44.45             | 0                 | 7                     | 0                 |
|         |                                                  | 175.74            | 0                 | 24                    | 0                 |
|         |                                                  | 37.36             | 0                 | 4                     | 0                 |
|         |                                                  | 47.39             | 0                 | 3                     | 0                 |
|         |                                                  | 56.49             | 0                 | 7                     | 0                 |
|         |                                                  | 111.42            | 10.62             | 9                     | 2                 |
|         |                                                  | 55.74             | 46                | 4                     | 3                 |
|         |                                                  | 289.69            | 0                 | 5                     | 0                 |
|         |                                                  | 0                 | 0                 | 0                     | 0                 |
|         |                                                  | 0                 | 0                 | 5                     | 0                 |
|         |                                                  | 27.09             | 11.89             | 0                     | 0                 |
|         |                                                  | 19.19             | 0                 | 3                     | 3                 |
|         |                                                  | 19.42             | 0                 | 3                     | 0                 |
|         |                                                  | 50.61             | 0                 | 1                     | 0                 |
| 12.76   | 0                                                | 4                 | 0                 |                       |                   |
| 106.31  | 0                                                | 1                 | 0                 |                       |                   |
| 58.19   | 0                                                | 8                 | 0                 |                       |                   |
| -       | -                                                | 5                 | 0                 |                       |                   |
| STUdb   | preimaginal<br>experience on<br><i>Stegobium</i> | 96.25             | 0                 | 4                     | 0                 |
|         |                                                  | 105.03            | 0                 | 5                     | 0                 |
|         |                                                  | 43.8              | 0                 | 1                     | 0                 |
|         |                                                  | 269.17            | 0                 | 6                     | 0                 |
|         |                                                  | 46.47             | 0                 | 2                     | 0                 |
|         |                                                  | 28.18             | 0.21              | 7                     | 0                 |
|         |                                                  | 47.55             | 0                 | 4                     | 0                 |
|         |                                                  | 104.52            | 0                 | 4                     | 1                 |

|                                                  |        |   |    |   |
|--------------------------------------------------|--------|---|----|---|
|                                                  | 166.56 | 0 | 4  | 0 |
|                                                  | 24.93  | 0 | 6  | 0 |
|                                                  | 88.99  | 0 | 5  | 0 |
|                                                  | 104.23 | 0 | 2  | 0 |
|                                                  | 244.66 | 0 | 2  | 0 |
|                                                  | 80.17  | 0 | 7  | 0 |
|                                                  | 86.85  | 0 | 8  | 0 |
|                                                  | 177    | 0 | 6  | 0 |
|                                                  | 176.36 | 0 | 8  | 0 |
|                                                  | 31.38  | 0 | 11 | 0 |
|                                                  | 56.21  | 0 | 4  | 0 |
|                                                  | 39.54  | 0 | 6  | 0 |
|                                                  | 79.74  | 0 | 6  | 0 |
|                                                  | 105.29 | 0 | 5  | 0 |
|                                                  | 336.01 | 0 | 5  | 0 |
|                                                  | 194.08 | 0 | 3  | 0 |
|                                                  | 32.49  | 0 | 6  | 0 |
|                                                  | 47     | 0 | 4  | 0 |
|                                                  | 67.71  | 0 | 3  | 0 |
|                                                  | 171.4  | 0 | 5  | 0 |
|                                                  | 84.41  | 0 | 6  | 0 |
|                                                  | 39.14  | 0 | 3  | 0 |
|                                                  | 50.39  | 0 | 4  | 0 |
|                                                  | 0      | 0 | 0  | 0 |
|                                                  | 283.03 | 0 | 10 | 0 |
|                                                  | 332.72 | 0 | 5  | 0 |
|                                                  | 221.75 | 0 | 4  | 0 |
|                                                  | 0      | 0 | 0  | 0 |
|                                                  | 0      | 0 | 0  | 0 |
|                                                  | 0      | 0 | 0  | 0 |
|                                                  | 32.78  | 0 | 1  | 0 |
|                                                  | 14.14  | 0 | 1  | 0 |
| BIRdb                                            | 478.24 | 0 | 3  | 0 |
| preimaginal<br>experience on<br><i>Stegobium</i> | 0      | 0 | 0  | 0 |
|                                                  | 85.29  | 0 | 8  | 0 |
|                                                  | 460.65 | 0 | 5  | 0 |
|                                                  | 7      | 0 | 1  | 0 |
|                                                  | 314.83 | 0 | 13 | 0 |
|                                                  | 331.8  | 0 | 6  | 0 |
|                                                  | 0      | 0 | 0  | 0 |
|                                                  | 54.91  | 0 | 3  | 0 |
|                                                  | 0      | 0 | 0  | 0 |
|                                                  | 82.04  | 0 | 2  | 0 |
|                                                  | 37.47  | 0 | 5  | 0 |
|                                                  | 33.67  | 0 | 1  | 0 |

|        |                                                  |        |        |    |    |
|--------|--------------------------------------------------|--------|--------|----|----|
|        |                                                  | 355.15 | 0      | 3  | 0  |
| PFOgw  | preimaginal<br>experience on<br><i>Stegobium</i> | 90.89  | 70.76  | 5  | 4  |
|        |                                                  | 56.73  | 36.68  | 4  | 5  |
|        |                                                  | 83.74  | 0      | 13 | 0  |
|        |                                                  | 0      | 257.54 | 0  | 8  |
|        |                                                  | 0      | 135.04 | 0  | 4  |
|        |                                                  | 120.4  | 0      | 10 | 0  |
|        |                                                  | 399.09 | 0      | 14 | 0  |
|        |                                                  | 0      | 51.04  | 0  | 4  |
|        |                                                  | 0      | 45.74  | 0  | 7  |
|        |                                                  | 31.66  | 0      | 5  | 0  |
|        |                                                  | 116.81 | 0      | 9  | 0  |
|        |                                                  | 200.3  | 0      | 7  | 0  |
|        |                                                  | 0      | 272.62 | 10 | 0  |
|        |                                                  | 444.37 | 0      | 1  | 3  |
|        |                                                  | 4.13   | 40.45  | 3  | 6  |
|        |                                                  | 29.8   | 98.28  | 10 | 0  |
|        |                                                  | 274.8  | 0      | 9  | 0  |
|        |                                                  | 419.39 | 0      | 2  | 6  |
|        |                                                  | 23.82  | 204.39 | 0  | 6  |
|        |                                                  | 0      | 144.87 | 0  | 8  |
|        |                                                  | 0      | 132.53 | 10 | 3  |
|        |                                                  | 74.01  | 33.67  | 9  | 0  |
|        |                                                  | 367.68 | 0      | 8  | 0  |
|        |                                                  | 271.17 | 0      | 3  | 0  |
|        |                                                  | 397.21 | 0      | 9  | 0  |
|        |                                                  | 299.29 | 0      | 7  | 0  |
|        |                                                  | 288.14 | 0      | 15 | 0  |
|        |                                                  | 339.23 | 0      | 7  | 0  |
|        |                                                  | 424.58 | 0      | 5  | 0  |
|        |                                                  | 310.41 | 0      | 2  | 0  |
| 11.58  | 0                                                | 0      | 1      |    |    |
| 52.36  | 0                                                | 8      | 0      |    |    |
| 350.42 | 0                                                | 14     | 0      |    |    |
| 336.2  | 0                                                | 13     | 0      |    |    |
| SLOgw  | preimaginal<br>experience on<br><i>Stegobium</i> | 57.46  | 319.44 | 7  | 4  |
|        |                                                  | 0      | 380.93 | 0  | 7  |
|        |                                                  | 2.49   | 122    | 1  | 2  |
|        |                                                  | 74.61  | 25.06  | 7  | 1  |
|        |                                                  | 32.99  | 135.39 | 3  | 6  |
|        |                                                  | 318.54 | 0      | 8  | 0  |
|        |                                                  | 108.36 | 0      | 10 | 0  |
|        |                                                  | 29.57  | 109.78 | 5  | 5  |
|        |                                                  | 0      | 214.99 | 0  | 17 |



|                                                  |        |        |    |    |
|--------------------------------------------------|--------|--------|----|----|
|                                                  | 0      | 185.45 | 0  | 13 |
|                                                  | 0      | 163.23 | 0  | 5  |
|                                                  | 278.72 | 0      | 11 | 0  |
|                                                  | 0      | 304.83 | 0  | 14 |
|                                                  | 0      | 125.08 | 0  | 4  |
|                                                  | 167.27 | 0      | 4  | 0  |
|                                                  | 0      | 230.92 | 0  | 6  |
|                                                  | 0      | 12.3   | 0  | 2  |
|                                                  | 11.78  | 231.8  | 1  | 4  |
|                                                  | 142.93 | 0      | 6  | 0  |
|                                                  | 0      | 395.72 | 0  | 11 |
|                                                  | 26.07  | 248.22 | 4  | 9  |
|                                                  | 161.85 | 49.06  | 12 | 2  |
|                                                  | 135.54 | 0      | 10 | 0  |
|                                                  | 150.41 | 0      | 14 | 0  |
|                                                  | 0      | 79.31  | 0  | 2  |
|                                                  | 0      | 263.8  | 0  | 9  |
|                                                  | 0      | 103.41 | 0  | 13 |
|                                                  | 0      | 131.09 | 0  | 5  |
|                                                  | 107.51 | 0      | 9  | 0  |
|                                                  | 0      | 199.44 | 0  | 4  |
|                                                  | 64.38  | 0      | 10 | 0  |
|                                                  | 0      | 126.42 | 9  | 0  |
|                                                  | 0      | 20.83  | 0  | 4  |
|                                                  | 8.44   | 42.23  | 0  | 2  |
|                                                  | -      | -      | 1  | 6  |
| SATgw preimaginal experience on <i>Stegobium</i> | 0      | 141.54 | 0  | 2  |
|                                                  | 0      | 0      | 0  | 0  |
|                                                  | 39.15  | 0      | 4  | 0  |
|                                                  | 208.19 | 0      | 3  | 0  |
|                                                  | 120.88 | 0      | 5  | 0  |
|                                                  | 0      | 249.6  | 0  | 3  |
|                                                  | 0      | 0      | 0  | 0  |
|                                                  | 0      | 0      | 0  | 0  |
|                                                  | 46.45  | 0      | 7  | 0  |
|                                                  | 0      | 0      | 0  | 0  |
|                                                  | 0      | 0      | 0  | 0  |
|                                                  | 0      | 0      | 0  | 0  |
|                                                  | 0      | 0      | 0  | 0  |
|                                                  | 0      | 56.13  | 0  | 3  |
|                                                  | 0      | 0      | 0  | 0  |
|                                                  | 0      | 180.43 | 0  | 3  |
|                                                  | 0      | 0      | 0  | 0  |
|                                                  | 71.56  | 0      | 5  | 0  |

|                                                   |        |        |    |   |
|---------------------------------------------------|--------|--------|----|---|
|                                                   | 0      | 0      | 0  | 0 |
|                                                   | 0      | 59.67  | 0  | 4 |
|                                                   | 0      | 57.38  | 0  | 4 |
|                                                   | 0      | 127.6  | 0  | 4 |
|                                                   | 0      | 283.22 | 0  | 2 |
|                                                   | 122.05 | 0      | 0  | 4 |
|                                                   | 299.2  | 0      | 1  | 0 |
|                                                   | 186.43 | 0      | 6  | 0 |
|                                                   | 0      | 0      | 4  | 0 |
|                                                   | 0      | 0      | 0  | 0 |
|                                                   | 10     | 0      | 0  | 0 |
|                                                   | 0      | 0      | 1  | 0 |
|                                                   | 126.39 | 0      | 0  | 0 |
|                                                   | 0      | 0      | 3  | 0 |
|                                                   | 45.29  | 0      | 0  | 0 |
|                                                   | 12.34  | 0      | 3  | 0 |
|                                                   | -      | -      | 1  | 0 |
| RAVdb preimaginal experience on <i>Sitophilus</i> | 304.22 | 0      | 3  | 0 |
|                                                   | 328.18 | 0      | 7  | 0 |
|                                                   | 101.95 | 0      | 8  | 0 |
|                                                   | 86.73  | 0      | 5  | 0 |
|                                                   | 16.65  | 0      | 1  | 0 |
|                                                   | 46.49  | 5.89   | 4  | 0 |
|                                                   | 66.08  | 0      | 4  | 1 |
|                                                   | 262.09 | 0      | 4  | 0 |
|                                                   | 91.34  | 0      | 11 | 0 |
|                                                   | 0      | 121.84 | 4  | 0 |
|                                                   | 216.04 | 0      | 0  | 7 |
|                                                   | 101.99 | 0      | 11 | 0 |
|                                                   | 163.13 | 24.61  | 9  | 0 |
|                                                   | 81.24  | 0      | 7  | 2 |
|                                                   | 0      | 29.61  | 7  | 0 |
|                                                   | 16.58  | 12.97  | 0  | 2 |
|                                                   | 78.03  | 0      | 2  | 1 |
|                                                   | 73.75  | 10.8   | 6  | 0 |
|                                                   | 136.44 | 0      | 4  | 1 |
|                                                   | 224.61 | 0      | 11 | 0 |
|                                                   | 69.04  | 0      | 8  | 0 |
|                                                   | 183.24 | 0      | 7  | 0 |
|                                                   | 148.05 | 0      | 8  | 0 |
|                                                   | 298.68 | 0      | 6  | 0 |
|                                                   | 18.52  | 0      | 6  | 0 |
|                                                   | 230.63 | 0      | 3  | 0 |
|                                                   | 122.07 | 0      | 14 | 0 |

|        |                                                   |        |       |    |   |
|--------|---------------------------------------------------|--------|-------|----|---|
|        |                                                   | 19.49  | 0     | 9  | 0 |
|        |                                                   | 81.86  | 34.14 | 2  | 0 |
|        |                                                   | 190.86 | 0     | 2  | 4 |
|        |                                                   | 196.78 | 0     | 8  | 0 |
|        |                                                   | 100.37 | 0     | 13 | 0 |
|        |                                                   | 89.61  | 0     | 4  | 0 |
|        |                                                   | -      | -     | 6  | 0 |
| STUdb  | preimaginal<br>experience on<br><i>Sitophilus</i> | 444.79 | 0     | 5  | 0 |
|        |                                                   | 388.46 | 0     | 13 | 0 |
|        |                                                   | 377.5  | 0     | 3  | 0 |
|        |                                                   | 368.03 | 0     | 13 | 0 |
|        |                                                   | 469.2  | 0     | 9  | 0 |
|        |                                                   | 230.15 | 0     | 12 | 0 |
|        |                                                   | 34.88  | 0     | 2  | 0 |
|        |                                                   | 40.82  | 0     | 3  | 0 |
|        |                                                   | 99.16  | 0     | 5  | 0 |
|        |                                                   | 271.36 | 0     | 7  | 0 |
|        |                                                   | 110.23 | 15.12 | 6  | 1 |
|        |                                                   | 352.95 | 0     | 10 | 0 |
|        |                                                   | 253.07 | 0     | 7  | 0 |
|        |                                                   | 116.93 | 3.5   | 9  | 1 |
|        |                                                   | 160.19 | 0     | 8  | 0 |
|        |                                                   | 369.93 | 0     | 18 | 0 |
|        |                                                   | 142.54 | 0     | 12 | 0 |
|        |                                                   | 311.71 | 0     | 14 | 0 |
|        |                                                   | 13.57  | 0     | 2  | 0 |
|        |                                                   | 84.87  | 0     | 11 | 0 |
|        |                                                   | 95.37  | 0     | 5  | 0 |
|        |                                                   | 343.59 | 0     | 3  | 1 |
|        |                                                   | 253.13 | 0     | 8  | 0 |
|        |                                                   | 102.24 | 0     | 13 | 0 |
|        |                                                   | 86.27  | 0     | 8  | 0 |
|        |                                                   | 196.88 | 0     | 6  | 0 |
|        |                                                   | 130.58 | 0     | 7  | 0 |
|        |                                                   | 89.73  | 0     | 7  | 0 |
|        |                                                   | 127.95 | 0     | 4  | 0 |
|        |                                                   | 219.18 | 0     | 12 | 0 |
| 312.67 | 0                                                 | 11     | 0     |    |   |
| 10.91  | 0                                                 | 11     | 0     |    |   |
| 334.71 | 0                                                 | 2      | 0     |    |   |
|        |                                                   | -      | -     | 10 | 0 |
| BIRdb  | preimaginal<br>experience on<br><i>Sitophilus</i> | 0      | 0     | 0  | 0 |
|        |                                                   | 286.05 | 0     | 9  | 0 |
|        |                                                   | 0      | 0     | 0  | 0 |

|  |        |        |    |   |
|--|--------|--------|----|---|
|  | 80.31  | 0      | 7  | 0 |
|  | 0      | 0      | 0  | 0 |
|  | 110.61 | 0      | 7  | 0 |
|  | 0      | 16.45  | 0  | 1 |
|  | 0      | 0      | 0  | 0 |
|  | 5.34   | 0      | 1  | 0 |
|  | 22.6   | 0      | 3  | 0 |
|  | 121.75 | 0      | 2  | 0 |
|  | 0      | 87.85  | 0  | 5 |
|  | 252.6  | 0      | 4  | 0 |
|  | 57.26  | 0      | 6  | 0 |
|  | 71.36  | 9.32   | 4  | 1 |
|  | 97.44  | 0      | 8  | 0 |
|  | 91.43  | 0      | 7  | 0 |
|  | 181.22 | 0      | 7  | 0 |
|  | 80.64  | 0      | 6  | 0 |
|  | 178.6  | 0      | 8  | 0 |
|  | 336.77 | 0      | 7  | 0 |
|  | 12.28  | 235.35 | 1  | 2 |
|  | 51.34  | 209.09 | 4  | 2 |
|  | 0      | 277.68 | 0  | 4 |
|  | 0      | 0      | 0  | 0 |
|  | 0      | 0      | 0  | 0 |
|  | 0      | 0      | 0  | 0 |
|  | 0      | 0      | 0  | 0 |
|  | 0      | 0      | 0  | 0 |
|  | 0      | 0      | 0  | 0 |
|  | 277.2  | 0      | 4  | 0 |
|  | 0      | 100.04 | 0  | 8 |
|  | 202.13 | 0      | 0  | 2 |
|  | 397.81 | 0      | 3  | 0 |
|  | 174.96 | 0      | 1  | 3 |
|  | 0      | 61.51  | 2  | 0 |
|  | 30.8   | 0      | 4  | 0 |
|  | 119.56 | 0      | 0  | 6 |
|  | 356.96 | 0      | 3  | 0 |
|  | 260.11 | 0      | 7  | 0 |
|  | 0      | 0      | 5  | 0 |
|  | 53.12  | 0      | 3  | 0 |
|  | 82.05  | 8.78   | 0  | 0 |
|  | 151.23 | 0      | 3  | 0 |
|  | 75.8   | 0      | 8  | 1 |
|  | 0      | 176.14 | 11 | 0 |
|  | 0      | 20.58  | 10 | 0 |
|  | 0      | 62.52  | 0  | 7 |

PFOgw preimaginal experience on *Sitophilus*

|       |                                                   |        |        |   |    |
|-------|---------------------------------------------------|--------|--------|---|----|
|       |                                                   | 51.4   | 0      | 0 | 2  |
|       |                                                   | 64.41  | 85.12  | 0 | 3  |
|       |                                                   | 14.22  | 0      | 4 | 0  |
|       |                                                   | 189.47 | 0      | 3 | 3  |
|       |                                                   | 285.69 | 0      | 3 | 0  |
|       |                                                   | 7.06   | 0      | 7 | 0  |
|       |                                                   | 0      | 0      | 9 | 0  |
|       |                                                   | 8.25   | 30.25  | 2 | 0  |
|       |                                                   | 122.11 | 0      | 0 | 0  |
|       |                                                   | 0      | 0      | 1 | 5  |
|       |                                                   | -      | -      | 1 | 0  |
|       |                                                   | -      | -      | 0 | 0  |
|       |                                                   | 2.46   | 7.3    | 1 | 1  |
|       |                                                   | 0      | 323.38 | 0 | 9  |
|       |                                                   | 0      | 336.79 | 0 | 7  |
|       |                                                   | 81.28  | 0      | 0 | 0  |
|       |                                                   | 0      | 0      | 0 | 9  |
|       |                                                   | 0      | 148.76 | 0 | 0  |
|       |                                                   | 0      | 0      | 0 | 0  |
|       |                                                   | 0      | 0      | 0 | 3  |
|       |                                                   | 0      | 238.56 | 0 | 1  |
|       |                                                   | 0      | 2.66   | 0 | 0  |
|       |                                                   | 0      | 0      | 0 | 4  |
|       |                                                   | 0      | 265.49 | 0 | 4  |
|       |                                                   | 0      | 85.46  | 0 | 4  |
|       |                                                   | 0      | 183.8  | 0 | 2  |
|       |                                                   | 0      | 38.74  | 0 | 6  |
|       |                                                   | 0      | 102.08 | 2 | 10 |
|       |                                                   | 14.97  | 159.64 | 0 | 0  |
|       |                                                   | 0      | 0      | 0 | 0  |
|       |                                                   | 0      | 0      | 0 | 0  |
|       |                                                   | 0      | 0      | 0 | 2  |
|       |                                                   | 0      | 160.35 | 0 | 0  |
|       |                                                   | 0      | 0      | 0 | 12 |
|       |                                                   | 0      | 207.05 | 0 | 3  |
|       |                                                   | 0      | 309.67 | 1 | 6  |
|       |                                                   | 54.42  | 67.35  | 0 | 3  |
|       |                                                   | 0      | 189.27 | 3 | 2  |
|       |                                                   | 71.78  | 38.03  | 0 | 1  |
|       |                                                   | 0      | 241.32 | 0 | 2  |
|       |                                                   | 0      | 37.94  | - | -  |
|       |                                                   | 10.26  | 0      | 1 | 0  |
|       |                                                   | 0      | 178.4  | 0 | 6  |
|       |                                                   | 22.49  | 0      | 3 | 0  |
| SLOgw | preimaginal<br>experience on<br><i>Sitophilus</i> |        |        |   |    |
| SATgw | preimaginal<br>experience on<br><i>Sitophilus</i> |        |        |   |    |

|                                                              |        |        |   |   |
|--------------------------------------------------------------|--------|--------|---|---|
|                                                              | 77.18  | 0      | 5 | 0 |
|                                                              | 4.13   | 46.74  | 1 | 3 |
|                                                              | 49.87  | 0      | 0 | 0 |
|                                                              | 62.43  | 87.83  | 1 | 1 |
|                                                              | 16.96  | 0      | 2 | 0 |
|                                                              | 0      | 24.44  | 0 | 4 |
|                                                              | 0      | 97.2   | 0 | 4 |
|                                                              | 0      | 134.99 | 0 | 3 |
|                                                              | 0      | 10.7   | 0 | 2 |
|                                                              | 8.19   | 0      | 1 | 0 |
|                                                              | 0      | 79.31  | 0 | 0 |
|                                                              | 0      | 216.38 | 0 | 3 |
|                                                              | 0      | 88.71  | 0 | 6 |
|                                                              | 0      | 74.47  | 0 | 1 |
|                                                              | 0      | 56.27  | 0 | 2 |
|                                                              | 0      | 336.7  | 0 | 0 |
|                                                              | 22.62  | 0      | 0 | 2 |
|                                                              | 0      | 122.22 | 0 | 2 |
|                                                              | 0      | 167.98 | 1 | 0 |
|                                                              | 294.8  | 0      | 0 | 5 |
|                                                              | 0      | 45.9   | 0 | 2 |
|                                                              | 0      | 228.03 | 5 | 0 |
|                                                              | 0      | 89.96  | 0 | 3 |
|                                                              | 0      | 338.11 | 0 | 5 |
|                                                              | 85.85  | 0      | 0 | 8 |
|                                                              | -      | -      | 0 | 4 |
| RAVdb<br>early imaginal<br>experience on<br><i>Stegobium</i> | 15.4   | 0      | 3 | 0 |
|                                                              | 251.85 | 0      | 0 | 0 |
|                                                              | 0      | 0      | 1 | 0 |
|                                                              | 11.42  | 0      | 5 | 2 |
|                                                              | 0      | 0      | 0 | 0 |
|                                                              | 50.95  | 26.72  | 2 | 1 |
|                                                              | 0      | 0      | 0 | 3 |
|                                                              | 0      | 87.63  | 7 | 0 |
|                                                              | 23.19  | 10.51  | 3 | 2 |
|                                                              | 51.89  | 0      | 1 | 1 |
|                                                              | 21.56  | 6.67   | 0 | 0 |
|                                                              | 2.53   | 3.56   | 3 | 0 |
|                                                              | 6.5    | 0      | 1 | 0 |
|                                                              | 11.36  | 0      | 1 | 0 |
|                                                              | 0      | 10.57  | 0 | 2 |
|                                                              | 39.05  | 0      | 2 | 0 |
|                                                              | 0      | 0      | 0 | 0 |
|                                                              | 0      | 0      | 0 | 0 |

|                                                              |        |       |    |   |
|--------------------------------------------------------------|--------|-------|----|---|
|                                                              | 18.26  | 0     | 2  | 0 |
|                                                              | 27.19  | 0     | 4  | 0 |
|                                                              | 25.73  | 0     | 3  | 0 |
|                                                              | 73.38  | 0     | 5  | 0 |
|                                                              | 53.99  | 0     | 6  | 0 |
|                                                              | 0      | 0     | 0  | 0 |
|                                                              | 51.78  | 0     | 8  | 0 |
|                                                              | 16.95  | 0     | 2  | 0 |
|                                                              | 79.81  | 4.53  | 3  | 1 |
|                                                              | 36.14  | 0     | 3  | 0 |
| STUdb<br>early imaginal<br>experience on<br><i>Stegobium</i> | 30.25  | 0     | 3  | 0 |
|                                                              | 71.39  | 0     | 4  | 0 |
|                                                              | 0      | 0     | 0  | 0 |
|                                                              | 77.79  | 0     | 0  | 3 |
|                                                              | 387.71 | 0     | 5  | 0 |
|                                                              | 300.25 | 0     | 5  | 0 |
|                                                              | 0      | 78.47 | 4  | 0 |
|                                                              | 0      | 0     | 0  | 1 |
|                                                              | 143.59 | 0     | 0  | 0 |
|                                                              | 222.06 | 32.46 | 3  | 0 |
|                                                              | 269.69 | 0     | 3  | 1 |
|                                                              | 0      | 47.47 | 6  | 0 |
|                                                              | 14.12  | 0     | 0  | 1 |
|                                                              | 0      | 0     | 4  | 0 |
|                                                              | 44.14  | 0     | 0  | 0 |
|                                                              | 272.39 | 0     | 2  | 0 |
|                                                              | 40.01  | 0     | 3  | 0 |
|                                                              | 0      | 0     | 4  | 0 |
|                                                              | 0      | 0     | 0  | 0 |
|                                                              | 10.7   | 0     | 0  | 0 |
|                                                              | 50.66  | 0     | 1  | 0 |
|                                                              | 8.3    | 0     | 2  | 0 |
|                                                              | 0      | 0     | 1  | 0 |
|                                                              | 0      | 124.2 | 0  | 0 |
|                                                              | 0      | 0     | 0  | 0 |
|                                                              | 0      | 0     | 0  | 0 |
|                                                              | 23.06  | 0     | 2  | 0 |
| 0                                                            | 0      | 0     | 0  |   |
| 0                                                            | 47.61  | 0     | 2  |   |
| BIRdb<br>early imaginal<br>experience on<br><i>Stegobium</i> | 150.48 | 0     | 7  | 0 |
|                                                              | 146.13 | 42.28 | 7  | 2 |
|                                                              | 234.09 | 0     | 5  | 0 |
|                                                              | 297.78 | 0     | 10 | 0 |
|                                                              | 101.78 | 0     | 6  | 0 |

|                                                              |        |        |    |   |
|--------------------------------------------------------------|--------|--------|----|---|
|                                                              | 462.8  | 0      | 2  | 0 |
|                                                              | 25.11  | 6.18   | 3  | 1 |
|                                                              | 246.16 | 9.39   | 5  | 2 |
|                                                              | 342.87 | 0      | 5  | 0 |
|                                                              | 329.92 | 0      | 10 | 0 |
|                                                              | 224.72 | 0      | 4  | 0 |
|                                                              | 47.19  | 0      | 3  | 0 |
|                                                              | 358.96 | 0      | 5  | 0 |
|                                                              | 30.94  | 16.2   | 6  | 2 |
|                                                              | 141.43 | 0      | 8  | 0 |
|                                                              | 191.82 | 0      | 7  | 0 |
|                                                              | 162.61 | 0      | 10 | 0 |
|                                                              | 95.27  | 0      | 8  | 0 |
|                                                              | 20.09  | 0      | 4  | 0 |
|                                                              | 197.23 | 0      | 6  | 0 |
|                                                              | 0      | 0      | 0  | 0 |
|                                                              | 122.39 | 0      | 8  | 0 |
|                                                              | 294.65 | 0      | 0  | 3 |
|                                                              | 0      | 25.38  | 5  | 0 |
|                                                              | 317.27 | 0      | 3  | 0 |
|                                                              | 53.3   | 0      | 6  | 0 |
|                                                              | 224.49 | 0      | 8  | 1 |
|                                                              | 217.82 | 35.09  | 0  | 1 |
|                                                              | 0      | 1.59   | -  | - |
| PFOgw<br>early imaginal<br>experience on<br><i>Stegobium</i> | 365.72 | 0      | 7  | 0 |
|                                                              | 384.41 | 0      | 3  | 0 |
|                                                              | 67.67  | 0      | 3  | 0 |
|                                                              | 143.62 | 0      | 3  | 0 |
|                                                              | 57.05  | 0      | 2  | 0 |
|                                                              | 0      | 0      | 0  | 0 |
|                                                              | 138.78 | 0      | 0  | 7 |
|                                                              | 0      | 54.37  | 2  | 0 |
|                                                              | 394.93 | 0      | 0  | 3 |
|                                                              | 16.19  | 169.97 | 2  | 0 |
|                                                              | 0      | 0      | 3  | 5 |
|                                                              | 1.73   | 0      | 0  | 0 |
|                                                              | 0      | 0      | 1  | 0 |
|                                                              | 36.54  | 0      | 0  | 0 |
|                                                              | 0      | 0      | 5  | 0 |
|                                                              | 148.1  | 0      | 0  | 0 |
|                                                              | 6.2    | 0      | 5  | 0 |
|                                                              | 295.86 | 0      | 1  | 0 |
|                                                              | 11.76  | 0      | 3  | 0 |
|                                                              | 111.7  | 64.25  | 2  | 0 |



|       |                                                     |        |    |    |
|-------|-----------------------------------------------------|--------|----|----|
|       | 13.25                                               | 0      | 1  | 5  |
|       | 43.49                                               | 0      | 2  | 0  |
|       | 17.79                                               | 1.73   | 6  | 0  |
|       | 0                                                   | 0      | 3  | 1  |
|       | 0                                                   | 54.1   | 0  | 0  |
|       | 6.46                                                | 0      | 0  | 7  |
|       | 0                                                   | 0      | 1  | 0  |
|       | 379.67                                              | 0      | 0  | 0  |
|       | -                                                   | -      | 8  | 0  |
|       | 0                                                   | 0      | 0  | 0  |
|       | 142.35                                              | 0      | 0  | 11 |
|       | 219.8                                               | 0      | 4  | 0  |
|       | 95.42                                               | 0      | 5  | 0  |
|       | 0                                                   | 0      | 6  | 0  |
|       | 0                                                   | 0      | 0  | 0  |
|       | 0                                                   | 0      | 0  | 0  |
|       | 0                                                   | 94.44  | 0  | 0  |
|       | 61.41                                               | 0      | 0  | 5  |
|       | 0                                                   | 188.21 | 5  | 0  |
|       | 8                                                   | 0      | 0  | 11 |
|       | 0                                                   | 0      | 1  | 0  |
|       | 0                                                   | 0      | 0  | 0  |
|       | 145.82                                              | 0      | 0  | 0  |
|       | 0                                                   | 79.12  | 6  | 0  |
|       | 0                                                   | 56.93  | 0  | 6  |
|       | 0                                                   | 0      | 0  | 2  |
|       | 189.05                                              | 0      | 0  | 0  |
|       | 175.07                                              | 0      | 8  | 0  |
|       | 351.21                                              | 0      | 1  | 0  |
|       | 80.86                                               | 0      | 4  | 0  |
|       | 0                                                   | 0      | 3  | 0  |
|       | 2.29                                                | 0      | 0  | 0  |
|       | 2.32                                                | 0      | 1  | 0  |
|       | 0                                                   | 152.84 | 1  | 0  |
|       | 182.07                                              | 0      | 0  | 8  |
|       | 392.61                                              | 0      | 12 | 0  |
|       | 0                                                   | 6      | 9  | 0  |
|       | 0                                                   | 16     | 0  | 1  |
|       | -                                                   | -      | 0  | 1  |
|       | 197.58                                              | 0      | 2  | 0  |
|       | 263.59                                              | 0      | 3  | 0  |
|       | 263.69                                              | 0      | 3  | 0  |
|       | 3.77                                                | 0      | 1  | 0  |
|       | 0                                                   | 241.65 | 0  | 4  |
| SLOgw | early imaginal<br>experience on<br><i>Stegobium</i> |        |    |    |
| SATgw | early imaginal<br>experience on<br><i>Stegobium</i> |        |    |    |

|       |        |        |    |   |
|-------|--------|--------|----|---|
|       | 64.4   | 0      | 4  | 0 |
|       | 0      | 330.56 | 0  | 2 |
|       | 159.37 | 0      | 4  | 0 |
|       | 155.97 | 0      | 2  | 0 |
|       | 124.76 | 0      | 2  | 0 |
|       | 0      | 328.3  | 0  | 3 |
|       | 0      | 0      | 0  | 0 |
|       | 0      | 10.31  | 0  | 1 |
|       | 266.16 | 0      | 1  | 0 |
|       | 8.53   | 0      | 1  | 0 |
|       | 216.2  | 0      | 3  | 0 |
|       | 299.86 | 0      | 2  | 0 |
|       | 23.19  | 375.3  | 5  | 3 |
|       | 136.27 | 0      | 4  | 0 |
|       | 21.99  | 0      | 3  | 0 |
|       | 0      | 0      | 0  | 0 |
|       | 0      | 0      | 0  | 0 |
|       | 0      | 305.23 | 0  | 4 |
|       | 221.67 | 0      | 1  | 0 |
|       | 21.92  | 0      | 1  | 0 |
|       | 0      | 0      | 0  | 0 |
|       | 7.53   | 0      | 2  | 0 |
|       | 40.95  | 0      | 6  | 0 |
|       | 0      | 270.78 | 0  | 3 |
|       | 0      | 273.25 | 0  | 1 |
| RAVdb | 183.72 | 0      | 7  | 0 |
|       | 14.44  | 0      | 3  | 0 |
|       | 0      | 0      | 2  | 0 |
|       | 112.57 | 0      | 2  | 0 |
|       | 77.13  | 0      | 6  | 1 |
|       | 48.37  | 103.46 | 6  | 0 |
|       | 39.07  | 0      | 8  | 0 |
|       | 17.75  | 0      | 0  | 0 |
|       | 20.02  | 150.91 | 2  | 1 |
|       | 80.63  | 0      | 7  | 0 |
|       | 21.44  | 0      | 1  | 0 |
|       | 74.54  | 0      | 0  | 0 |
|       | 75.37  | 0      | 4  | 0 |
|       | 200.29 | 0      | 6  | 0 |
|       | 293.55 | 0      | 3  | 6 |
|       | 0      | 0      | 4  | 0 |
|       | 299.01 | 0      | 2  | 0 |
|       | 13.72  | 0      | 3  | 6 |
|       | 78.87  | 0      | 11 | 0 |

early imaginal  
experience on  
*Sitophilus*

|  |  |        |        |    |   |
|--|--|--------|--------|----|---|
|  |  | 23.95  | 0      | 3  | 0 |
|  |  | 31.31  | 6.92   | 13 | 0 |
|  |  | 131.64 | 0      | 6  | 0 |
|  |  | 59.91  | 0      | 5  | 0 |
|  |  | 0      | 0      | 7  | 0 |
|  |  | 38     | 10.75  | 0  | 0 |
|  |  | 43.35  | 4.28   | 5  | 1 |
|  |  | 27.57  | 133.99 | 5  | 3 |
|  |  | 177.76 | 0      | 6  | 0 |
|  |  | 13.82  | 0      | 3  | 0 |
|  |  | 110.1  | 0      | 11 | 0 |
|  |  | 97.32  | 0      | 7  | 0 |
|  |  | 78.48  | 0      | 5  | 0 |
|  |  | 79.56  | 13.8   | 1  | 2 |
|  |  | 0      | 0      | 6  | 0 |
|  |  | 161.94 | 0      | 5  | 0 |
|  |  | 101.67 | 0      | 6  | 0 |
|  |  | 87.63  | 0      | 2  | 0 |
|  |  | 32.65  | 0      | 8  | 0 |
|  |  | 267.55 | 0      | 1  | 0 |
|  |  | 0      | 254.09 | 4  | 0 |
|  |  | 35.79  | 0      | 2  | 0 |
|  |  | 238.1  | 0      | 5  | 0 |
|  |  | 119.24 | 0      | 3  | 0 |
|  |  | 237.92 | 0      | 3  | 0 |
|  |  | 136.56 | 0      | 5  | 0 |
|  |  | 88.27  | 0      | 3  | 0 |
|  |  | 39.87  | 0      | 4  | 0 |
|  |  | 256.34 | 0      | 2  | 0 |
|  |  | 98.54  | 0      | 3  | 0 |
|  |  | 168.98 | 0      | 4  | 0 |
|  |  | 0      | 0      | 5  | 0 |
|  |  | 197.84 | 0      | 2  | 0 |
|  |  | 74.94  | 0      | 6  | 0 |
|  |  | 220.87 | 0      | 2  | 0 |
|  |  | 113.09 | 0      | 4  | 0 |
|  |  | 179.54 | 0      | 0  | 1 |
|  |  | 0      | 256.98 | 1  | 0 |
|  |  | 21.11  | 0      | 0  | 3 |
|  |  | 0      | 48.35  | -  | - |
|  |  | 33.96  | 0      | 3  | 0 |
|  |  | 58.82  | 0      | 7  | 0 |
|  |  | 204.25 | 0      | 4  | 0 |
|  |  | 297.05 | 0      | 3  | 0 |

STUdb early imaginal experience on *Sitophilus*

BIRdb early imaginal experience on *Sitophilus*

|                                                               |        |        |   |    |
|---------------------------------------------------------------|--------|--------|---|----|
|                                                               | 205.14 | 0      | 4 | 0  |
|                                                               | 232.59 | 0      | 4 | 0  |
|                                                               | 215.28 | 0      | 4 | 0  |
|                                                               | 43.16  | 0      | 3 | 0  |
|                                                               | 336.08 | 0      | 7 | 0  |
|                                                               | 194.47 | 0      | 4 | 0  |
|                                                               | 422.64 | 0      | 3 | 0  |
|                                                               | 315.19 | 0      | 6 | 0  |
|                                                               | 243.65 | 0      | 4 | 0  |
|                                                               | 122.73 | 0      | 2 | 0  |
|                                                               | 4.5    | 0      | 1 | 0  |
|                                                               | 0      | 49.25  | 6 | 0  |
|                                                               | 313.54 | 0      | 6 | 0  |
|                                                               | 139.65 | 0      | 5 | 0  |
|                                                               | 209.51 | 0      | 0 | 2  |
|                                                               | 342.82 | 0      | 4 | 0  |
|                                                               | 229.3  | 0      | 6 | 0  |
|                                                               | 161.58 | 62.78  | 3 | 1  |
|                                                               | 156.12 | 0      | 2 | 0  |
|                                                               | 297.79 | 0      | 3 | 0  |
|                                                               | 342.64 | 0      | 7 | 0  |
|                                                               | 219.69 | 0      | 4 | 0  |
|                                                               | 0      | 226.24 | 0 | 2  |
|                                                               | 136.9  | 0      | 4 | 0  |
| PFOgw<br>early imaginal<br>experience on<br><i>Sitophilus</i> | 72.06  | 0      | 2 | 0  |
|                                                               | 0      | 114.16 | 0 | 1  |
|                                                               | 264.96 | 0      | 3 | 0  |
|                                                               | 0      | 0      | 0 | 0  |
|                                                               | 0      | 7.23   | 0 | 1  |
|                                                               | 182.87 | 0      | 2 | 0  |
|                                                               | 189.75 | 0      | 7 | 0  |
|                                                               | 0      | 0      | 0 | 0  |
|                                                               | 0      | 0      | 0 | 0  |
|                                                               | 0      | 67.64  | 0 | 1  |
|                                                               | 0      | 19.91  | 0 | 2  |
|                                                               | 0      | 138.91 | 1 | 0  |
|                                                               | 40.6   | 0      | 0 | 11 |
|                                                               | 0      | 239.96 | 0 | 0  |
|                                                               | 0      | 0      | 0 | 0  |
|                                                               | 377.51 | 0      | 0 | 0  |
|                                                               | 0      | 115.53 | 4 | 0  |
|                                                               | 0      | 0      | 0 | 8  |
|                                                               | 318.85 | 0      | 3 | 0  |
|                                                               | 0      | 67.12  | 0 | 7  |

|                                                               |        |        |   |    |
|---------------------------------------------------------------|--------|--------|---|----|
|                                                               | 258.55 | 0      | 7 | 0  |
|                                                               | 66.89  | 0      | 6 | 0  |
|                                                               | 0      | 0      | 0 | 1  |
|                                                               | 0      | 33.01  | 1 | 4  |
|                                                               | 5.89   | 17.25  | 1 | 1  |
|                                                               | 0      | 165.43 | 0 | 2  |
|                                                               | 37.13  | 54.88  | 3 | 1  |
|                                                               | 0      | 180.39 | 0 | 5  |
|                                                               | 0      | 116.7  | 0 | 3  |
| SLOgw<br>early imaginal<br>experience on<br><i>Sitophilus</i> | 232.22 | 0      | 6 | 0  |
|                                                               | 0      | 89.41  | 0 | 6  |
|                                                               | 2.53   | 0      | 1 | 0  |
|                                                               | 0      | 60.2   | 0 | 2  |
|                                                               | 0      | 194.44 | 0 | 6  |
|                                                               | 0      | 217.64 | 0 | 6  |
|                                                               | 0      | 0      | 0 | 0  |
|                                                               | 0      | 7.31   | 0 | 2  |
|                                                               | 0      | 0      | 0 | 0  |
|                                                               | 10.03  | 0      | 1 | 0  |
|                                                               | 0      | 0      | 0 | 0  |
|                                                               | 0      | 205.57 | 0 | 3  |
|                                                               | 8.2    | 55.97  | 2 | 1  |
|                                                               | 0      | 225.66 | 0 | 6  |
|                                                               | 13.21  | 0      | 2 | 0  |
|                                                               | 0      | 319    | 0 | 6  |
|                                                               | 0      | 82.89  | 0 | 6  |
|                                                               | 50.09  | 5.67   | 2 | 1  |
|                                                               | 0      | 0      | 4 | 0  |
|                                                               | 0      | 0      | 0 | 0  |
|                                                               | 0      | 191.8  | 0 | 0  |
|                                                               | 87.88  | 0      | 0 | 9  |
|                                                               | 0      | 198.24 | 6 | 0  |
|                                                               | 0      | 365.45 | 0 | 5  |
|                                                               | 0      | 254.91 | 0 | 4  |
|                                                               | 0      | 334.92 | 0 | 5  |
|                                                               | 0      | 138.37 | 0 | 7  |
|                                                               | 164.17 | 0      | 0 | 10 |
| 0                                                             | 206.92 | 4      | 0 |    |
| -                                                             | -      | 0      | 8 |    |
| SATgw<br>early imaginal<br>experience on<br><i>Sitophilus</i> | 0      | 0      | 0 | 0  |
|                                                               | 0      | 19.38  | 0 | 2  |
|                                                               | 0      | 124.86 | 0 | 3  |
|                                                               | 0      | 146.66 | 0 | 4  |
|                                                               | 0      | 12.92  | 0 | 1  |

|  |       |        |   |   |
|--|-------|--------|---|---|
|  | 0     | 0      | 0 | 0 |
|  | 56.78 | 2.64   | 1 | 5 |
|  | 4.19  | 116.21 | 0 | 5 |
|  | 0     | 290.23 | 0 | 3 |
|  | 0     | 53.81  | 0 | 0 |
|  | 0     | 0      | 0 | 0 |
|  | 0     | 0      | 0 | 4 |
|  | 0     | 107.65 | 0 | 1 |
|  | 0     | 169.19 | 0 | 5 |
|  | 0     | 217.22 | 0 | 2 |
|  | 0     | 314.29 | 1 | 0 |
|  | 10.61 | 0      | 0 | 2 |
|  | 0     | 29     | 0 | 1 |
|  | 0     | 19.12  | 0 | 2 |
|  | 0     | 93.47  | 0 | 1 |
|  | 0     | 85.86  | 0 | 2 |
|  | 0     | 213.24 | 0 | 2 |
|  | 0     | 73.7   | 0 | 0 |
|  | 0     | 0      | 0 | 2 |
|  | 0     | 322.99 | 0 | 2 |
|  | 0     | 88.19  | 1 | 0 |
|  | 1.33  | 0      | 0 | 1 |
|  | 0     | 156.39 | 1 | 0 |
|  | 3.12  | 0      | - | - |

**Table S8:** Offspring of the different strains on the two different hosts *Stegobium* (red) and *Sitophilus* (blue).

| stamm | wirt             | offspring |
|-------|------------------|-----------|
| RAVdb | <i>Stegobium</i> | 39        |
| RAVdb | <i>Stegobium</i> | 70        |
| RAVdb | <i>Stegobium</i> | 131       |
| RAVdb | <i>Stegobium</i> | 20        |
| RAVdb | <i>Stegobium</i> | 43        |
| RAVdb | <i>Stegobium</i> | 53        |
| RAVdb | <i>Stegobium</i> | 73        |
| RAVdb | <i>Stegobium</i> | 45        |
| RAVdb | <i>Stegobium</i> | 0         |
| RAVdb | <i>Stegobium</i> | 83        |
| RAVdb | <i>Stegobium</i> | 67        |
| RAVdb | <i>Stegobium</i> | 61        |
| RAVdb | <i>Stegobium</i> | 83        |

|       |                   |     |
|-------|-------------------|-----|
| RAVdb | <i>Sitophilus</i> | 33  |
| RAVdb | <i>Sitophilus</i> | 37  |
| RAVdb | <i>Sitophilus</i> | 6   |
| RAVdb | <i>Sitophilus</i> | 34  |
| RAVdb | <i>Sitophilus</i> | 14  |
| RAVdb | <i>Sitophilus</i> | 0   |
| RAVdb | <i>Sitophilus</i> | 21  |
| RAVdb | <i>Sitophilus</i> | 12  |
| RAVdb | <i>Sitophilus</i> | 32  |
| RAVdb | <i>Sitophilus</i> | 15  |
| RAVdb | <i>Sitophilus</i> | 0   |
| RAVdb | <i>Sitophilus</i> | 0   |
| RAVdb | <i>Sitophilus</i> | 30  |
| RAVdb | <i>Sitophilus</i> | 6   |
| RAVdb | <i>Sitophilus</i> | 19  |
| STUdb | <i>Stegobium</i>  | 1   |
| STUdb | <i>Stegobium</i>  | 54  |
| STUdb | <i>Stegobium</i>  | 121 |
| STUdb | <i>Stegobium</i>  | 124 |
| STUdb | <i>Stegobium</i>  | 79  |
| STUdb | <i>Stegobium</i>  | 100 |
| STUdb | <i>Stegobium</i>  | 89  |
| STUdb | <i>Stegobium</i>  | 68  |
| STUdb | <i>Stegobium</i>  | 105 |
| STUdb | <i>Stegobium</i>  | 62  |
| STUdb | <i>Stegobium</i>  | 120 |
| STUdb | <i>Stegobium</i>  | 109 |
| STUdb | <i>Stegobium</i>  | 113 |
| STUdb | <i>Stegobium</i>  | 126 |
| STUdb | <i>Stegobium</i>  | 29  |
| STUdb | <i>Stegobium</i>  | 62  |
| STUdb | <i>Stegobium</i>  | 56  |
| STUdb | <i>Stegobium</i>  | 134 |
| STUdb | <i>Sitophilus</i> | 13  |
| STUdb | <i>Sitophilus</i> | 0   |
| STUdb | <i>Sitophilus</i> | 0   |
| STUdb | <i>Sitophilus</i> | 1   |
| STUdb | <i>Sitophilus</i> | 1   |
| STUdb | <i>Sitophilus</i> | 13  |
| STUdb | <i>Sitophilus</i> | 15  |
| STUdb | <i>Sitophilus</i> | 0   |
| STUdb | <i>Sitophilus</i> | 18  |
| STUdb | <i>Sitophilus</i> | 0   |
| STUdb | <i>Sitophilus</i> | 24  |
| STUdb | <i>Sitophilus</i> | 11  |

|       |                   |     |
|-------|-------------------|-----|
| STUdb | <i>Sitophilus</i> | 25  |
| STUdb | <i>Sitophilus</i> | 0   |
| STUdb | <i>Sitophilus</i> | 19  |
| STUdb | <i>Sitophilus</i> | 0   |
| STUdb | <i>Sitophilus</i> | 10  |
| STUdb | <i>Sitophilus</i> | 18  |
| STUdb | <i>Sitophilus</i> | 31  |
| STUdb | <i>Sitophilus</i> | 20  |
| STUdb | <i>Sitophilus</i> | 0   |
| STUdb | <i>Sitophilus</i> | 0   |
| STUdb | <i>Sitophilus</i> | 51  |
| STUdb | <i>Sitophilus</i> | 15  |
| STUdb | <i>Sitophilus</i> | 0   |
| STUdb | <i>Sitophilus</i> | 51  |
| STUdb | <i>Sitophilus</i> | 14  |
| STUdb | <i>Sitophilus</i> | 0   |
| STUdb | <i>Sitophilus</i> | 11  |
| STUdb | <i>Sitophilus</i> | 0   |
| STUdb | <i>Sitophilus</i> | 1   |
| PFOgw | <i>Stegobium</i>  | 3   |
| PFOgw | <i>Stegobium</i>  | 50  |
| PFOgw | <i>Stegobium</i>  | 5   |
| PFOgw | <i>Stegobium</i>  | 82  |
| PFOgw | <i>Stegobium</i>  | 93  |
| PFOgw | <i>Stegobium</i>  | 3   |
| PFOgw | <i>Stegobium</i>  | 134 |
| PFOgw | <i>Stegobium</i>  | 1   |
| PFOgw | <i>Stegobium</i>  | 0   |
| PFOgw | <i>Stegobium</i>  | 76  |
| PFOgw | <i>Stegobium</i>  | 42  |
| PFOgw | <i>Stegobium</i>  | 0   |
| PFOgw | <i>Stegobium</i>  | 0   |
| PFOgw | <i>Stegobium</i>  | 128 |
| PFOgw | <i>Stegobium</i>  | 129 |
| PFOgw | <i>Stegobium</i>  | 104 |
| PFOgw | <i>Stegobium</i>  | 16  |
| PFOgw | <i>Stegobium</i>  | 42  |
| PFOgw | <i>Sitophilus</i> | 38  |
| PFOgw | <i>Sitophilus</i> | 72  |
| PFOgw | <i>Sitophilus</i> | 10  |
| PFOgw | <i>Sitophilus</i> | 34  |
| PFOgw | <i>Sitophilus</i> | 56  |
| PFOgw | <i>Sitophilus</i> | 37  |
| PFOgw | <i>Sitophilus</i> | 25  |
| PFOgw | <i>Sitophilus</i> | 65  |



|       |                   |     |
|-------|-------------------|-----|
| PFOgw | <i>Sitophilus</i> | 23  |
| PFOgw | <i>Sitophilus</i> | 55  |
| PFOgw | <i>Sitophilus</i> | 35  |
| PFOgw | <i>Sitophilus</i> | 12  |
| PFOgw | <i>Sitophilus</i> | 47  |
| PFOgw | <i>Sitophilus</i> | 52  |
| PFOgw | <i>Sitophilus</i> | 63  |
| PFOgw | <i>Sitophilus</i> | 68  |
| PFOgw | <i>Sitophilus</i> | 60  |
| PFOgw | <i>Sitophilus</i> | 0   |
| PFOgw | <i>Sitophilus</i> | 57  |
| SLOgw | <i>Stegobium</i>  | 74  |
| SLOgw | <i>Stegobium</i>  | 73  |
| SLOgw | <i>Stegobium</i>  | 84  |
| SLOgw | <i>Stegobium</i>  | 62  |
| SLOgw | <i>Stegobium</i>  | 50  |
| SLOgw | <i>Stegobium</i>  | 25  |
| SLOgw | <i>Stegobium</i>  | 21  |
| SLOgw | <i>Stegobium</i>  | 86  |
| SLOgw | <i>Stegobium</i>  | 50  |
| SLOgw | <i>Stegobium</i>  | 4   |
| SLOgw | <i>Stegobium</i>  | 58  |
| SLOgw | <i>Stegobium</i>  | 115 |
| SLOgw | <i>Stegobium</i>  | 89  |
| SLOgw | <i>Stegobium</i>  | 94  |
| SLOgw | <i>Stegobium</i>  | 75  |
| SLOgw | <i>Stegobium</i>  | 117 |
| SLOgw | <i>Stegobium</i>  | 16  |
| SLOgw | <i>Sitophilus</i> | 85  |
| SLOgw | <i>Sitophilus</i> | 115 |
| SLOgw | <i>Sitophilus</i> | 124 |
| SLOgw | <i>Sitophilus</i> | 108 |
| SLOgw | <i>Sitophilus</i> | 94  |
| SLOgw | <i>Sitophilus</i> | 83  |
| SLOgw | <i>Sitophilus</i> | 119 |
| SLOgw | <i>Sitophilus</i> | 73  |
| SLOgw | <i>Sitophilus</i> | 91  |
| SLOgw | <i>Sitophilus</i> | 115 |
| SLOgw | <i>Sitophilus</i> | 124 |
| SLOgw | <i>Sitophilus</i> | 109 |
| SLOgw | <i>Sitophilus</i> | 90  |
| SLOgw | <i>Sitophilus</i> | 82  |
| SATgw | <i>Stegobium</i>  | 103 |
| SATgw | <i>Stegobium</i>  | 58  |
| SATgw | <i>Stegobium</i>  | 107 |

|       |                   |     |
|-------|-------------------|-----|
| SATgw | <i>Stegobium</i>  | 97  |
| SATgw | <i>Stegobium</i>  | 138 |
| SATgw | <i>Stegobium</i>  | 131 |
| SATgw | <i>Stegobium</i>  | 114 |
| SATgw | <i>Stegobium</i>  | 123 |
| SATgw | <i>Stegobium</i>  | 112 |
| SATgw | <i>Stegobium</i>  | 141 |
| SATgw | <i>Stegobium</i>  | 111 |
| SATgw | <i>Stegobium</i>  | 128 |
| SATgw | <i>Stegobium</i>  | 92  |
| SATgw | <i>Stegobium</i>  | 79  |
| SATgw | <i>Stegobium</i>  | 103 |
| SATgw | <i>Stegobium</i>  | 127 |
| SATgw | <i>Stegobium</i>  | 94  |
| SATgw | <i>Stegobium</i>  | 124 |
| SATgw | <i>Sitophilus</i> | 66  |
| SATgw | <i>Sitophilus</i> | 128 |
| SATgw | <i>Sitophilus</i> | 108 |
| SATgw | <i>Sitophilus</i> | 114 |
| SATgw | <i>Sitophilus</i> | 79  |
| SATgw | <i>Sitophilus</i> | 99  |
| SATgw | <i>Sitophilus</i> | 108 |
| SATgw | <i>Sitophilus</i> | 164 |
| SATgw | <i>Sitophilus</i> | 150 |
| SATgw | <i>Sitophilus</i> | 134 |
| SATgw | <i>Sitophilus</i> | 98  |
| SATgw | <i>Sitophilus</i> | 87  |
| SATgw | <i>Sitophilus</i> | 120 |
| SATgw | <i>Sitophilus</i> | 135 |
| SATgw | <i>Sitophilus</i> | 91  |
| SATgw | <i>Sitophilus</i> | 96  |
| SATgw | <i>Sitophilus</i> | 109 |
| SATgw | <i>Sitophilus</i> | 115 |

### Supplemental References

- S01 Simon, C., Frati, F., Beckenbach, A., Crespi, B., Liu, H. & Flook, P. 1994 Evolution, weighting, and phylogenetic utility of mitochondrial gene sequences and a compilation of conserved polymerase chain reaction primers. *Ann. Entomol. Soc. Am.* **87**, 651-701.

- S02 Quicke, D. L. J., Mori, M., Laurenne, N. M & Shaw, M. R. 2006 Suspended mummies in *Aleiodes* species (Hymenoptera: Braconidae: Rogadinae) with descriptions of six new species from western Uganda based largely on DNA sequence data. *J. Natur. Hist.* **40**, 2663-2680. (doi: 10.1080/00222930601121288)
- S03 Hartig, G., Peters, R. S., Borner, J., Eitzbauer, C., Misof, B. & Niehuis, O. 2012 Oligonucleotide primers for targeted amplification of single-copy nuclear genes in Apocritan Hymenoptera. *PLoS ONE*, **7/6**, e39826. (doi: 10.1371/journal.pone.0039826)
- S04 Hasegawa M, Kishino H, Yano T (1985). Dating of the human-ape splitting by a molecular clock of mitochondrial DNA. *J. Mol. Evol.* **22** (2): 160–74. doi:10.1007/BF02101694. PMID 3934395.).
- S05 Kimura M (1980). A simple method for estimating evolutionary rates of base substitutions through comparative studies of nucleotide sequences. *J. Mol. Evol.* **16** (2): 111–20. doi:10.1007/BF01731581. PMID 7463489.
- S06 Jukes, T.H., Cantor, C.R. (1969). Evolution of protein molecules. In: Munro, H.N. (Ed.) *Mammalian protein metabolism*. New York: Academic Press. pp. 21–123.
- S07 Yang, Z. 1994. Maximum likelihood phylogenetic estimation from DNA sequences with variable rates over sites: approximate methods. *J. Mol. Evol.* **39**:306–314.
- S08 Tamura, K., Stecher, G., Peterson, D., Filipski, A. & Kumar, S. 2013 MEGA6: Molecular Evolutionary Genetics Analysis Version 6.0. *Mol. Biol. Evol.* **30**: 2725-2729. (doi: 10.1093/molbev/mst197)
